# Supplementary material for: Increase of HO-1 Expression in Critically Ill COVID-19 Patients Is Associated with Poor Prognosis and Outcome
Source: MDPI journal article supplement (doi:10.3390/antiox11071300), 2022-06-29
Supplement: s1 [file s1]

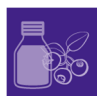

# Supplementary Materials: Increase of HO-1 Expression in Critically Ill COVID-19 Patients Is Associated with Poor Prognosis and Outcome

## Increase of HO-1 Expression in Critically Ill COVID-19 Patients Is Associated with Poor Prognosis and Outcome

Maria G. Detsika <sup>1</sup>, Ioanna Nikitopoulou <sup>1</sup>, Dimitris Veroutis <sup>2</sup>, Alice G. Vassiliou <sup>1</sup>, Edison Jahaj <sup>1</sup>, Stamatis Tsipilis <sup>1</sup>, Nikolaos Athanassiou <sup>1</sup>, Hariklia Gakiopoulou <sup>3</sup>, Vassilis G. Gorgoulis <sup>2,4,5,6,7</sup>, Ioanna Dimopoulou <sup>1</sup>, Stylianos E. Orfanos <sup>1</sup> and Anastasia Kotanidou <sup>1,\*</sup>

<sup>1</sup> 1st Department of Critical Care Medicine & Pulmonary Services, GP Livanos and M Simou Laboratories, Evangelismos Hospital, National and Kapodistrian University of Athens, 10675 Athens, Greece; mdetsika@med.uoa.gr (M.G.D.); joannaniki@gmail.com (I.N.); alvass75@gmail.com (A.G.V.); edison.jahaj@gmail.com (E.J.); stamostsipil@gmail.com (S.T.); nikolaosathanassiou14@gmail.com (N.A.); idimo@otenet.gr (I.D.); sorfanos@med.uoa.gr (S.E.O.)

<sup>2</sup> Molecular Carcinogenesis Group, Department of Histology and Embryology, Medical School, National and Kapodistrian University of Athens, 10675 Athens, Greece; dimitrisveroutis1@gmail.com (D.V.); vgorg@med.uoa.gr (V.G.G.)

<sup>3</sup> First Department of Pathology, Medical School, National and Kapodistrian University of Athens, 11527 Athens, Greece; charagak28@gmail.com

<sup>4</sup> Biomedical Research Foundation, Academy of Athens, 10675 Athens, Greece

<sup>5</sup> Faculty Institute for Cancer Sciences, Manchester Academic Health Sciences Centre, University of Manchester, Manchester M20 4GJ, UK

<sup>6</sup> Center for New Biotechnologies and Precision Medicine, Medical School, National and Kapodistrian University of Athens, 10675 Athens, Greece

<sup>7</sup> Faculty of Health and Medical Sciences, University of Surrey, Surrey GU2 7YH, UK

\* Correspondence: akotanid@med.uoa.gr

### Supplementary Figure S1. SARS-CoV-2 absence in tissue samples from critical COVID-19 patients.

Representative images of SARS-CoV-2 (G2 mAb) staining in lung, heart and skin tissue sections which were negative for SARS-CoV-2 presence. Magnification at X400.

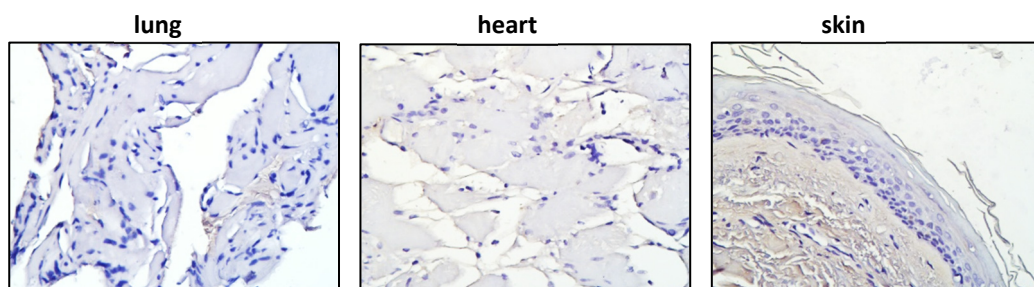

(+) Anti-SARS-CoV-2 mAb  
(G2)
